# Supplementary material for: Clinicians’ Role in the Adoption of an Oncology Decision Support App in Europe and Its Implications for Organizational Practices: Qualitative Case Study
Source: PubMed Central journal article supplement (PMC6524456; doi:10.2196/13555), 2019-05-03

# Clinicians' roles in the adoption of mHealth

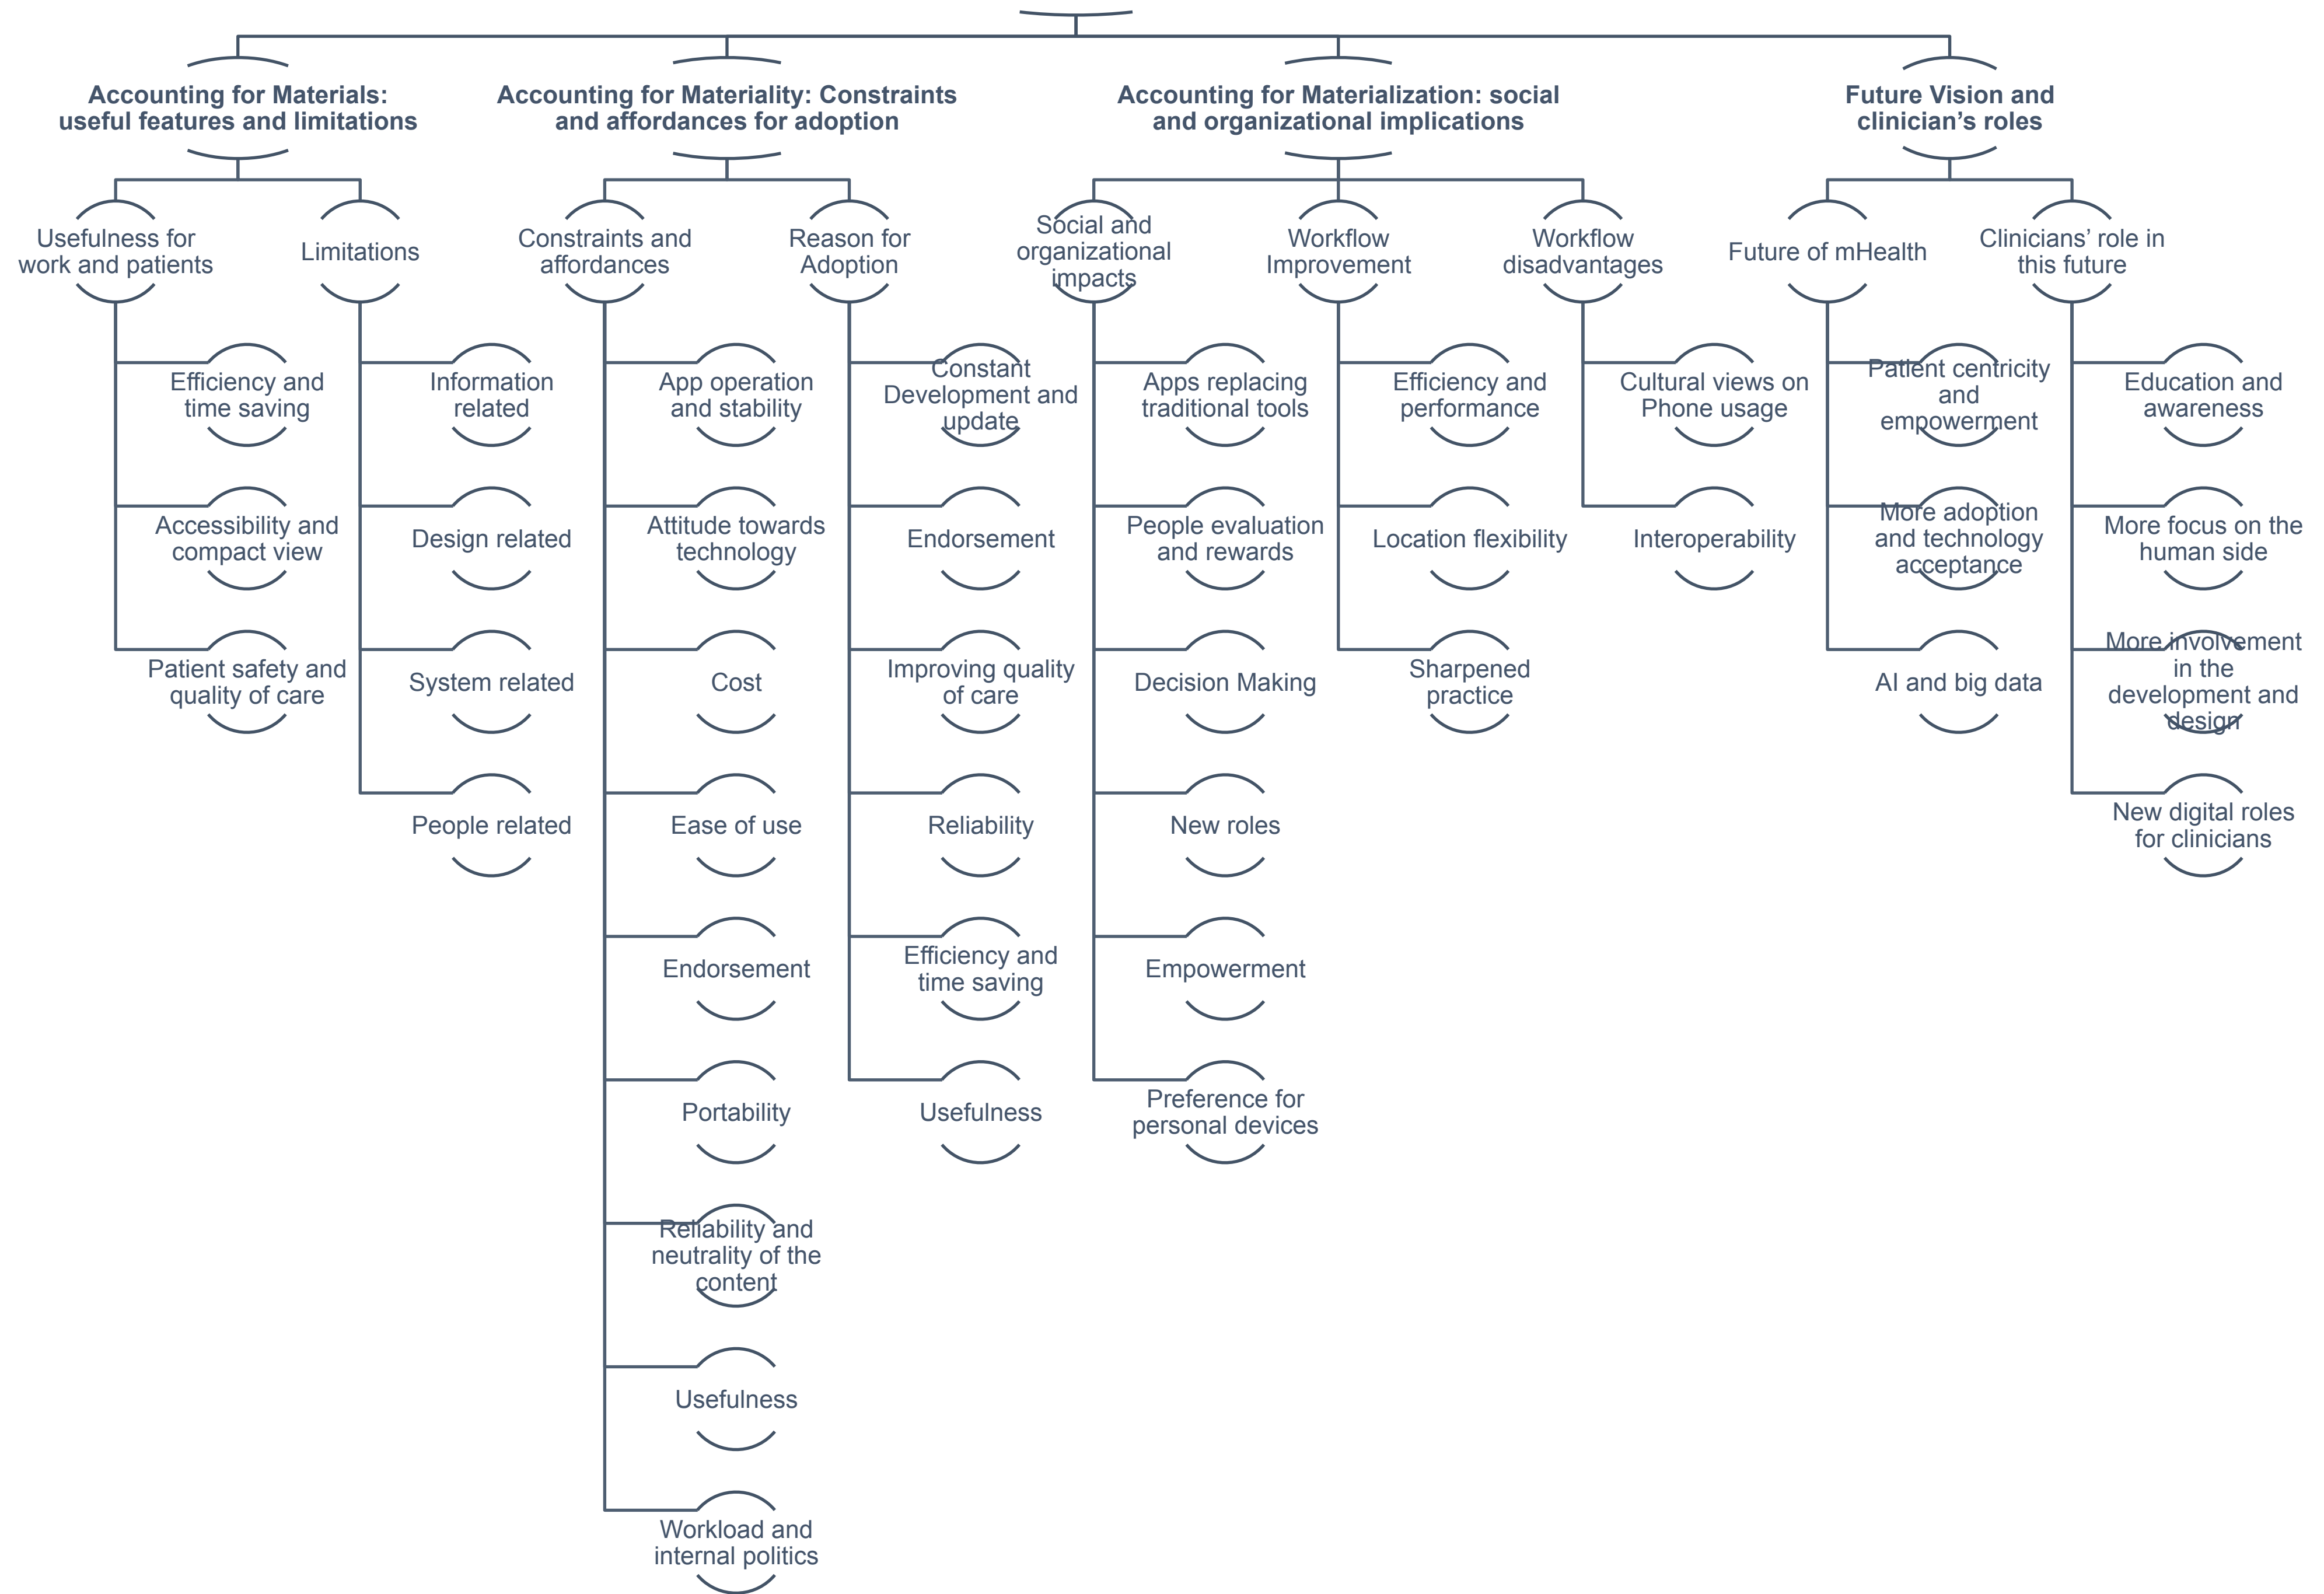

Supplement: mhealth_v7i5e13555_app3.pdf [file mhealth_v7i5e13555_app3.pdf]
